# Supplementary material for: Modeling Conformational Ensembles of Slow Functional Motions in Pin1-WW
Source: PLoS Comput Biol. 2010 Dec 2;6(12):e1001015. doi: 10.1371/journal.pcbi.1001015 (PMC2996313; doi:10.1371/journal.pcbi.1001015)
Supplement: Dataset S1 — The MSM transition matrix for the Extended 1 dataset. (0.05 MB XLS) [file pcbi.1001015.s003.xls]

## Sheet: Sheet1
tProb1	Transition Probability Matrix from MSM model			Extended 1
0.963355	0.000445534	0	0	0	0.00217198	0	0.0006683	0.000167075	0	0	0	0	0	0	0.00701715	0	0	0	0	0.000167075	0	0	0.000222767	0	0.00378703	0.000111383	0	5.56917e-05	0	0	0	0	0.000723992	0.000167075	0	0	0.0187681	0.000445534	0.00172644
5.09561e-05	0.7648	1.91085e-05	0	0	0.00289813	0	0	0.0537714	0.000178346	0.00257965	0.00119747	0	5.09561e-05	0.00064969	0.0373126	6.36951e-06	0.00155416	0	0	0	0.000414018	0	0.0300768	0.000471344	0.00796825	6.36951e-05	0	0.0083759	3.18475e-05	0.00101912	8.91731e-05	0.000815297	0.00091084	3.8217e-05	0.00879629	0.000108282	0.0735742	0.000369431	0.00180894
0	0.000557828	0.898103	0	0	0.0013016	0	0	0.00911119	0	0	0.0146895	0	0	0	0.0141316	0	0	0	0.00353291	0	0	0	0.00502045	0	0	0.000557828	0	0.0278914	0	0.000929714	0	0.00706582	0.00111566	0.000557828	0	0.000371885	0.0141316	0	0.000929714
0	0	0	0.909091	0	0	0	0	0	0	0	0	0	0	0	0.0174825	0	0	0	0	0	0	0	0	0.0699301	0	0	0	0.0034965	0	0	0	0	0	0	0	0	0	0	0
0	0	0	0	0.960843	0	0	0	0	0	0	0	0	0.00451807	0	0	0	0	0	0	0	0	0	0.0225904	0	0	0	0	0.0060241	0	0	0	0.0060241	0	0	0	0	0	0	0
0.000297933	0.00347588	5.34751e-05	0	0	0.964844	7.6393e-06	0	0.00300989	0.00195566	0	2.29179e-05	6.87537e-05	0	0	0.00666911	0	0	0	0	0	0	0	0.000129868	7.6393e-06	1.52786e-05	0	0	0.00172648	0	2.29179e-05	0	0.000672259	0.00536279	6.87537e-05	1.52786e-05	1.52786e-05	0.00401827	0.000152786	0.00738721
0	0	0	0	0	0.000481232	0.915303	0	0.0168431	0	0	0.00192493	0	0	0	0.0014437	0	0	0	0	0	0	0	0.000962464	0	0	0	0	0	0.000962464	0	0	0	0.018768	0	0	0	0.0346487	0.00866218	0
0.00245298	0	0	0	0	0	0	0.992232	0	0	0	0	0	0	0	0	0	0	0	0	0.00408831	0	0	0.000817661	0	0	0.000204415	0	0	0	0	0	0	0	0.000204415	0	0	0	0	0
5.67944e-06	0.0159819	9.27642e-05	0	0	0.0007459	6.62601e-05	0	0.884952	2.83972e-05	0.000664495	0.000450569	0	5.67944e-06	0.00100337	0.0137158	0.00013252	0.000424065	0	0.000185528	0	0.000164704	0	0.00269206	0.000355912	0.0172674	1.89315e-06	1.89315e-06	0.0137083	4.92218e-05	4.35424e-05	0.000276399	0.000897352	0.000685319	0.000549013	0.00106773	0.000348339	0.0427681	4.16492e-05	0.000626632
0	0.00158928	0	0	0	0.0145306	0	0	0.000851402	0.975139	0	0	0	0	0	0.00346237	0	0	0	0	0	0	0	0.00017028	0	0.00011352	0	0	0.00130548	0	0	0	0	0.00011352	0	0	0.000851402	0.000283801	0	0.00158928
0	0.0446035	0	0	0	0	0	0	0.0386564	0	0.818502	0.00572687	0.000770925	0	0.000110132	0.0497797	0	0.000660793	0	0	0	0.000220264	0	0.00495595	0	0.000660793	0	0	0.00561674	0.000440529	0	0	0.00220264	0.000440529	0	0	0.000220264	0.0258811	0	0.000550661
0	0.0085618	0.00359778	0	0	0.000136624	0.000182166	0	0.0108389	0	0.00236816	0.897714	0	0	4.55415e-05	0.0106567	0	0	0	4.55415e-05	0	0	0	0.00291466	4.55415e-05	0.000683122	0.00441752	0.00031879	0.00245924	0	0	0	0.00919938	4.55415e-05	0.00637581	0.00145733	0.00145733	0.00824301	0.000273249	0.0279625
0	0	0	0	0	0.00340909	0	0	0	0	0.00265152	0	0.936364	0	0	0.0378788	0	0	0	0	0	0	0	0.00719697	0	0.000757576	0	0	0.00719697	0	0	0	0	0.00378788	0	0	0	0	0.000757576	0
0	0.00311526	0	0	0.00116822	0	0	0	0.00116822	0	0	0	0	0.903427	0	0.0303738	0	0	0	0	0	0	0	0.00428349	0	0.00739875	0	0	0.0229751	0	0	0	0	0	0	0	0	0.0260903	0	0
0	0.00380654	0	0	0	0	0	0	0.0197791	0	3.7319e-05	3.7319e-05	0	0	0.923571	0.00821018	0	0.000186595	0	0	0	0	0	0.0159725	0	0.000597104	0	0	0.000149276	0	0	0	0	0	0	0.0263099	0	0.00134348	0	0
0.00108906	0.0506327	0.000656894	4.32167e-05	0	0.00754564	2.593e-05	0	0.062621	0.000527244	0.00390679	0.00202254	0.000864334	0.000674181	0.00190154	0.742083	1.72867e-05	0.00112363	8.64334e-06	0.000138293	0	0.000458097	0	0.0192314	0.00108906	0.0104066	0	0	0.0274858	0.00012965	0.00126193	1.72867e-05	0.00249793	0.00369071	0.000726041	0.0285317	0.00044081	0.0244866	0.00178917	0.00187561
0	0.00021692	0	0	0	0	0	0	0.0151844	0	0	0	0	0	0	0.000433839	0.956616	0	0	0	0	0	0.000433839	0	0.00997831	0	0	0	0.00715835	0	0	0.00672451	0.00195228	0.000650759	0.00021692	0	0.00021692	0.00021692	0	0
0	0.0168928	0	0	0	0	0	0	0.0155082	0	0.000415397	0	0	0	0.000346164	0.00900028	0	0.883412	0	0	0	0.00138466	0	0.000138466	0	0.0495015	0	0	0.000276932	0	0.00325395	0	0.00207699	6.92329e-05	0	0	6.92329e-05	0.00173082	0	0.0159236
0	0	0	0	0	0	0	0	0	0	0	0	0	0	0	0.025	0	0	0.95	0	0	0	0	0	0.025	0	0	0	0	0	0	0	0	0	0	0	0	0	0	0
0	0	0.00361217	0	0	0	0	0	0.0186312	0	0	0.000190114	0	0	0	0.00304183	0	0	0	0.93308	0	0	0	0.00114068	0.00304183	0	0	0	0.00114068	0	0	0	0	0.000190114	0.0193916	0	0	0.0131179	0.000380228	0.00304183
0.00176887	0	0	0	0	0	0	0.0117925	0	0	0	0	0	0	0	0	0	0	0	0	0.943396	0	0	0.0377358	0	0	0	0	0	0	0	0	0	0	0	0	0	0.000589623	0.00471698	0
0	0.0105144	0	0	0	0	0	0	0.0140731	0	0.00032352	0	0	0	0	0.00857328	0	0.0032352	0	0	0	0.891621	0.00016176	0.00032352	0	0.0273374	0	0.00695568	0.0219994	0	0	0	0.00064704	0	0	0	0.00016176	0.0140731	0	0
0	0	0	0	0	0	0	0	0	0	0	0	0	0	0	0	0.000878735	0	0	0	0	0.000439367	0.939367	0	0.000878735	0	0	0	0.0399824	0	0	0.0109842	0	0	0.00702988	0	0.000439367	0	0	0
4.36338e-05	0.0515097	0.000294528	0	0.000163627	0.000185444	2.18169e-05	4.36338e-05	0.0155118	3.27254e-05	0.000490881	0.000698141	0.000207261	0.000119993	0.00466882	0.0242713	0	2.18169e-05	0	6.54507e-05	0.000698141	2.18169e-05	0	0.767214	0.000785409	0.00218169	0.00102539	0	0.01501	0	0.000239986	0	0.00458155	0.000556331	0.00293437	0.0173008	0.000501789	0.0875731	2.18169e-05	0.00100358
0	0.00872847	0	0.00235905	0	0.000117952	0	0	0.022175	0	0	0.000117952	0	0	0	0.014862	0.00542581	0	0.000117952	0.00188724	0	0	0.000235905	0.00849257	0.922623	0	0	0	0.000353857	0.000117952	0	0	0.000353857	0	0.00778485	0	0.00106157	0.00283086	0.000353857	0
0.000613253	0.0112821	0	0	0	1.80369e-05	0	0	0.0822571	1.80369e-05	5.41106e-05	0.000135277	1.80369e-05	0.00017135	0.000144295	0.0108582	0	0.00644818	0	0	0	0.00152412	0	0.00180369	0	0.834043	0	0	0.0321688	0	0.000360737	1.80369e-05	0.00148804	2.70553e-05	0.000180369	0.000739512	5.41106e-05	0.01516	0	0.000414848
0.000489476	0.00244738	0.000734214	0	0	0	0	0.000244738	0.000244738	0	0	0.0237396	0	0	0	0	0	0	0	0	0	0	0	0.0230054	0	0	0.928536	0	0.000244738	0	0	0	0.0151738	0	0	0.000244738	0	0.0031816	0	0.00171317
0	0	0	0	0	0	0	0	0.000992063	0	0	0.00694444	0	0	0	0	0	0	0	0	0	0.0426587	0	0	0	0	0	0.94246	0.000992063	0	0	0	0.00595238	0	0	0	0	0	0	0
6.52154e-06	0.00857583	0.000978231	6.52154e-06	2.60862e-05	0.00147387	0	0	0.0472225	0.000149995	0.000332599	0.000352163	0.000123909	0.000384771	2.60862e-05	0.0207385	0.000215211	2.60862e-05	0	3.91292e-05	0	0.00088693	0.00059346	0.00897364	1.95646e-05	0.0232623	6.52154e-06	6.52154e-06	0.813406	0	0.00016956	0.000554331	0.0085693	0.000430422	0.000299991	9.13016e-05	0.000130431	0.0611394	0.000502159	0.000280426
0	0.00606796	0	0	0	0	0.00242718	0	0.0315534	0	0.00485437	0	0	0	0	0.0182039	0	0	0	0	0	0	0	0	0.00121359	0	0	0	0	0.90534	0	0	0	0.0157767	0	0	0	0.0109223	0.00364078	0
0	0.0434311	0.00135722	0	0	0.000814332	0	0	0.00624321	0	0	0	0	0	0	0.0396308	0	0.0127579	0	0	0	0	0	0.00597177	0	0.0108578	0	0	0.00705755	0	0.858849	0	0.00217155	0.00135722	0	0	0	0.00868621	0	0.000814332
0	0.00325052	0	0	0	0	0	0	0.0338983	0	0	0	0	0	0	0.00046436	0.00719759	0	0	0	0	0	0.0058045	0	0	0.00046436	0	0	0.0197353	0	0	0.920827	0	0.0011609	0.00696541	0	0	0.00023218	0	0
0	0.00410204	0.00121779	0	0.000128189	0.00282015	0	0	0.0151904	0	0.000640943	0.00647353	0	0	0	0.00926163	0.000288425	0.000961415	0	0	0	0.000128189	0	0.0134598	9.61415e-05	0.00528778	0.00198692	0.000192283	0.04211	0	0.000256377	0	0.852263	0.00112165	0.00150622	0.000160236	0.00121779	0.0378477	0	0.00128189
0.000854139	0.00939553	0.000394218	0	0	0.0461235	0.00256242	0	0.0237845	0.000131406	0.000262812	6.5703e-05	0.00065703	0	0	0.0280552	0.000197109	6.5703e-05	0	6.5703e-05	0	0	0	0.00335085	0	0.000197109	0	0	0.0043364	0.000854139	0.000328515	0.000328515	0.00229961	0.836005	0.000328515	0.00499343	0	0.0250329	0.000591327	0.0087385
0.000281479	0.000562957	0.000281479	0	0	0.000844436	0	9.38262e-05	0.0272096	0	0	0.0131357	0	0	0	0.0078814	9.38262e-05	0	0	0.00957028	0	0	0.00150122	0.0252393	0.00619253	0.00187652	0	0	0.00431601	0	0	0.00281479	0.00440983	0.000469131	0.856071	0.000375305	0.0179208	0.00487896	0.000562957	0.0134172
0	0.0198226	0	0	0	2.87076e-05	0	0	0.00809554	0	0	0.000459321	0	0	0.0101194	0.0473819	0	0	0	0	0	0	0	0.0227651	0	0.00117701	1.43538e-05	0	0.000200953	0	0	0	7.1769e-05	0.00109089	5.74152e-05	0.885715	0	0.00188035	0	0.0011196
0	0.0035095	0.000412882	0	0	0.000412882	0	0	0.0379851	0.00309661	0.000412882	0.00660611	0	0	0	0.0105285	0.000206441	0.000206441	0	0	0	0.000206441	0.000206441	0.00949628	0.00185797	0.00123865	0	0	0.00412882	0	0	0	0.00784476	0	0.0394302	0	0.85095	0.0134187	0	0.00784476
0.000761844	0.0261129	0.00017181	0	0	0.00118911	0.000162768	0	0.0510707	1.13033e-05	0.000531256	0.00040918	0	0.000151464	8.13839e-05	0.00640446	2.26066e-06	5.65166e-05	0	0.000155986	2.26066e-06	0.000196678	0	0.0181486	5.42559e-05	0.00380018	2.93886e-05	0	0.0211937	2.0346e-05	7.23412e-05	2.26066e-06	0.00266984	0.000861313	0.000117555	0.000296147	0.000146943	0.861982	0.000128858	0.00300442
0.00123762	0.00897277	0	0	0	0.00309406	0.00278465	0	0.00340347	0	0	0.000928218	0.000309406	0	0	0.0320235	0	0	0	0.000309406	0.00123762	0	0	0.000309406	0.000464109	0	0	0	0.0119121	0.000464109	0	0	0	0.00139233	0.000928218	0	0	0.00881807	0.91677	0.00464109
0.00112842	0.0103378	0.000182003	0	0	0.0351995	0	0	0.0120486	0.00101922	0.000182003	0.02235	0	0	0	0.00789895	0	0.00837216	0	0.000582411	0	0	0	0.00334886	0	0.00167443	0.000254805	0	0.00156523	0	0.000109202	0	0.00145603	0.00484129	0.0052053	0.00283925	0.00138323	0.0483765	0.00109202	0.828553
