# Supplementary material for: Modeling Conformational Ensembles of Slow Functional Motions in Pin1-WW
Source: PLOS journal article supplement (doi:10.1371/journal.pcbi.1001015), 2010-12-02
Supplement: S2 (10.1371/journal.pcbi.1001015.s002) [file journal.pcbi.1001015.s002]

---



---

**Algorithm S2. (Hybrid H-bond and MSM based) Exchange State Identification Algorithm**
**Input:**

Chemical Shift Values per residue.  $CS = \{CS_1, CS_2, \dots, CS_{33}\}$  where  $CS_i \in \mathcal{R}^N$

where  $N$  is the total number of frames in the simulation.

Macro states from MSMBuilder.  $MS = \{MS_1, MS_2, \dots, MS_M\}$

where  $M$  is the total number of macrostates.

H-bond frames in minor state from Algorithm S1.  $HB = \{HB_1, HB_2, \dots, HB_H\}$

where  $H$  is the total number of relevant H-bonds found by Algorithm S1.

**function** SUPERSTATESEARCH( $CS, MS, HB$ )

$SC \leftarrow \emptyset$

**for**  $i \leftarrow 1 \dots M$  **do**

▷  $M = 40$  in this study

**if**  $MS_i \cap HB > \delta$  **then**

▷  $\delta$  is the minimum intersection fraction  $\delta = 0.002$

$SC \leftarrow SC \cup MS_i$

▷  $SC$  Identifies relevant macrostates to reduce search

**end if**

**end for**

**for**  $k \leftarrow 1 \dots \lfloor |SC|/2 \rfloor + 1$  **do**

**for**  $z \leftarrow 1 \dots \binom{|SC|}{k}$  **do**

$StatesA \leftarrow SC(z)$

▷  $SC(x)$  is one of  $\binom{|SC|}{k}$  macrostate combinations in SC

$StatesB \leftarrow \{MS_1, MS_2, \dots, MS_{40}\} \setminus StatesA$

$\Phi_{ex} \leftarrow \text{Estimate}\Phi_{ex}(StatesA, StatesB, CS)$

▷ See Equation (2) in main paper

$\rho_{new} \leftarrow \rho(\Phi_{ex}, \mathbf{R}_{ex})$

**if**  $\rho_{new} > \rho_{best}$  **then**

$\rho_{best} \leftarrow \rho_{new}$

$SuperA \leftarrow StatesA$

$SuperB \leftarrow StatesB$

**end if**

**end for**

**end for**

**return**  $SuperA, SuperB, \rho_{best}$

**end function**

---
