# Supplementary material for: Modeling Conformational Ensembles of Slow Functional Motions in Pin1-WW
Source: PLOS journal article supplement (doi:10.1371/journal.pcbi.1001015), 2010-12-02
Supplement: S15 (10.1371/journal.pcbi.1001015.s015) [file journal.pcbi.1001015.s015]

301 Moved Permanently

# Moved Permanently

The document has moved here.

---

Apache Server at www.ploscompbiol.org Port 80
